# Supplementary material
Source: publisher figshare collection journal article supplement (https://rs.figshare.com/ndownloader/files/11181122)
Supplement: Supplementary file 1 [file 11181122]

## Sheet: Output_WhichDog3_m_s_Emily
Maximum Stride performance data in each run
* Charles (CAL), Goose (GSE), LpM25(LPM)	individual	maxStrideSpeed (ms-1)	runDistance (m)	runDuration (s)	maxCentriAccel (left turn) (ms-2)	maxCentriAccel (right turn) (ms-2)	maxTangAccel (ms-2)	maxTangDecel(ms-2)	meanPosHeadingrate (deg)	MeanStrideSpeed (ms-1)
Charles_2015-10-01_018	1	3.09592	23.9682	18.696	0.183662	-0.439325	0.405225	-1.50649	15.17	1.42343
Charles_2015-10-04_014	1	7.63213	48.6071	18.956	1.78221	-0.824961	0.542883	-3.82776	11.6953	3.48485
Charles_2015-10-04_015	1	6.74829	35.2632	17.756	1.12267	-0.426979	0.428307	-2.64948	20.9699	2.66544
Charles_2015-10-04_027	1	7.17622	33.5982	12.504	3.22116	-0.403655	0.803212	-3.54821	17.2789	3.88736
Charles_2015-10-11_021	1	7.33743	1447.3	797.44	2.89651	-0.417322	4.45308	-0.555938	10.2049	2.67833
Charles_2015-10-11_081	1	9.35778	72.8653	116.548	0.36916	-0.384932	4.41455	-0.983405	18.9218	5.91009
Charles_2015-10-12_004	1	7.32707	178.999	61.236	8.93547	-3.03069	2.85735	-5.21148	23.1957	3.38031
Charles_2015-10-12_010	1	5.22015	14.4307	16.052	1.60797	-0.00860943	0.259801	-3.78444	19.3593	1.65182
Charles_2015-10-12_018	1	5.20085	47.1674	27.284	1.3492	-1.70165	2.89913	-5.00937	29.8548	1.9375
Charles_2015-10-27_002	1	4.17072	40.5442	32.976	0.884646	-1.40563	2.07624	-3.46129	18.9507	1.49865
Charles_2015-10-27_005	1	7.55685	79.8891	62.7397	0.703836	-0.460208	1.27491	-0.380748	18.3517	1.98268
Charles_2015-10-27_007	1	7.64404	193.148	227.456	2.18707	-0.925645	1.58768	-3.00593	21.4071	2.21327
Charles_2015-10-27_010	1	4.29404	16.1461	15.504	1.44588	-1.35819	2.97119	-3.82483	41.597	1.30735
Charles_2015-10-27_037	1	8.46055	147.114	56.324	4.3116	-2.81568	4.80286	-4.77438	23.2514	3.14828
Charles_2015-10-27_043	1	3.3059	255.166	193.516	1.14385	-0.457369	0.816109	-0.877232	11.1997	1.83165
Charles_2015-10-30_194	1	8.72795	51.5033	8.364	3.38947	-0.709166	1.32062	-3.50287	12.9225	6.53318
Charles_2015-10-30_199	1	4.64768	62.3749	28.548	0.696033	-1.30286	1.76994	-1.0076	16.8742	2.38317
Charles_2015-10-30_204	1	5.68956	221.03	155.031	1.68999	-0.382225	1.09219	-0.319315	15.5796	2.68653
Charles_2015-10-30_209	1	3.095	35.848	18.28	1.59044	-2.09017	0.767107	-0.545418	27.1377	2.06964
Charles_2015-10-30_243	1	3.81929	26.7434	11.272	0.944922	-1.15103	0.854143	-1.36108	25.76	2.60129
Charles_2015-10-30_244	1	4.2842	26.0896	12.328	1.41211	-3.80473	2.0725	-1.7767	37.4834	2.41678
Charles_2015-10-30_253	1	3.47607	7.90416	7.444	0.150239	-0.00714352	0.137833	-4.29247	19.633	1.57556
Charles_2015-10-30_268	1	5.98422	29.4453	16.7451	0.604778	-1.57718	0.120013	-2.51174	20.0058	2.19991
Charles_2015-10-30_279	1	4.96869	32	18.9287	0.871796	-1.10249	1.80284	-1.38758	15.8845	2.52502
Charles_2015-10-30_280	1	7.26113	144.282	54.612	2.08636	-0.817366	0.501286	-0.874831	9.73101	5.2047
Charles_2015-10-30_285	1	6.87786	133.642	103.228	0.956326	-0.571648	1.30306	-0.286342	20.1719	2.23443
Charles_2015-10-30_297	1	6.01102	24.5573	9.96	1.94814	-0.852043	2.93126	-3.46397	23.1938	2.95716
Charles_2015-10-30_298	1	4.87494	29.5483	18.836	5.16424	-0.650501	1.35453	-3.87865	30.3511	2.21702
Charles_2015-10-30_311	1	6.11126	34.8904	16.872	0.664585	-0.803485	0.0842284	-1.96092	10.2732	2.50658
Charles_2015-10-30_341	1	3.62256	18.0621	11.192	1.47584	-1.55913	1.73754	-1.89449	34.5525	2.06334
Charles_2015-10-30_367	1	8.86331	74.1687	20.804	0.430694	-3.53485	1.74839	-6.56769	30.104	4.83851
Charles_2015-10-30_372	1	8.78411	98.0268	87.676	1.27718	-0.885787	0.501315	-0.671021	13.4788	7.1847
Charles_2015-10-30_408	1	3.40647	414.927	273.86	0.888212	-0.560805	1.61459	-0.482561	8.63	1.97513
Charles_2015-10-30_418	1	8.76803	30.3601	8.376	6.21423	-0.0203726	1.56379	-5.28	42.828	5.43349
Charles_2015-10-30_420	1	3.8004	64.0989	48.22	1.22423	-0.630951	1.67536	-1.1761	31.7275	0.832206
Charles_2015-10-30_423	1	3.07945	44.5186	26.964	1.50295	-0.699657	0.510471	-1.04945	20.0191	1.79773
Charles_2015-10-30_471	1	5.33769	179.256	85.04	1.25226	-0.0399234	3.2603	-0.562526	14.1922	2.61042
Charles_2015-10-30_486	1	7.38345	91.6838	26.62	1.85655	-0.708211	0.740207	-1.24194	10.3497	4.12182
Charles_2015-10-30_504	1	6.5589	1178.8	805.784	1.97917	-0.292882	3.44296	-0.593556	8.55228	1.71713
Charles_2015-11-03_009	1	3.00298	88.3398	67.112	0.150671	-0.280172	1.55945	-0.946328	14.5945	1.3488
Charles_2015-11-03_012	1	3.37374	81.5553	53.196	0.842864	-0.232259	0.697852	-1.1036	9.26962	1.80301
Goose_2015-10-02_021	2	5.24384	17.9698	5.388	-0.151394	-0.728671	1.7541	-1.43172	5.79095	3.80172
Goose_2015-10-09_004	2	3.71024	18.7194	11.368	0.136324	-0.487614	0.00960192	-1.5393	6.04781	2.04412
Goose_2015-10-09_006	2	7.35971	204.779	71.7089	1.49808	-1.11464	2.37747	-1.24725	15.1531	4.24572
Goose_2015-10-09_008	2	3.05091	95.0647	81.4478	0.260846	-0.320225	0.432961	-0.696612	10.0887	1.71723
Goose_2015-10-09_020	2	9.29378	113.648	199.414	0.603355	-0.559501	3.34375	-0.335998	18.0809	3.19673
Goose_2015-10-09_034	2	3.52508	81.1128	42.372	0.702348	-0.0539082	0.373828	-0.973496	6.57245	1.97421
Goose_2015-10-09_036	2	3.012	52.1784	28.4504	0.797857	-0.906662	0.51464	-0.977423	12.679	1.96303
Goose_2015-10-09_041	2	7.7971	59.2825	20.7673	2.8542	-0.798485	0.251392	-3.20714	13.8577	3.75663
Goose_2015-10-09_063	2	6.94487	38.8676	23.084	0.846218	-1.01198	3.51559	-6.56401	18.6767	3.30774
Goose_2015-10-09_066	2	7.50664	40.5068	20.4033	0.175889	-3.16184	1.23442	-5.1172	32.9714	2.89338
Goose_2015-10-09_072	2	3.71593	145.264	107.904	1.20285	-0.123514	0.79343	-0.819996	9.35757	2.15003
Goose_2015-10-09_080	2	8.88942	24.9909	10.1256	1.01818	-1.49715	0.655394	-5.70726	49.1386	3.07914
Goose_2015-10-09_083	2	3.16559	18.1877	16.0508	0.44947	-0.161894	0.0885394	-1.4084	11.5158	1.21335
Goose_2015-10-09_084	2	10.711	1016.73	1050.76	2.31403	-0.0781412	2.54493	-0.733423	8.92502	0.91007
Goose_2015-10-14_058	2	8.24728	84.266	21.252	4.64108	-1.11758	3.43843	-2.24175	11.7836	4.98935
Goose_2015-10-16_001	2	7.8834	345.428	297.935	1.49195	-0.110603	2.90039	-0.769988	10.2014	1.51924
Goose_2015-10-16_006	2	3.58453	224.563	133.955	1.14112	-0.371266	1.2153	-0.881994	9.43106	1.78907
Goose_2015-10-16_011	2	3.98872	617.961	575.207	1.4533	-0.33354	1.59215	-0.4462	10.8058	1.06252
Goose_2015-10-16_026	2	3.33085	291.656	159.148	1.37767	-0.459251	1.36601	-0.654588	9.83056	2.045
Goose_2015-10-16_032	2	4.18634	107.923	59.608	1.53851	-1.47076	1.65928	-1.34043	17.065	1.96127
Goose_2015-10-24_005	2	6.90675	23.7526	8.222	4.05274	-0.666199	1.21864	-3.80097	37.2875	3.51064
Goose_2015-10-24_028	2	4.21752	34.7749	21.904	0.703036	-0.202302	3.68778	-0.762417	11.3082	1.74345
Goose_2015-10-24_033	2	3.34169	37.1596	23.232	1.17417	-0.501827	0.33871	-1.186	14.0395	1.85789
Goose_2015-10-24_035	2	6.37822	242.086	336.356	2.79152	-0.193758	3.16421	-0.787023	11.4107	1.7147
Goose_2015-10-24_042	2	8.66051	78.3613	52.0527	4.19698	-0.814437	2.02579	-1.03563	27.0172	1.33084
Goose_2015-10-24_054	2	6.6521	92.8625	23.924	1.05988	-2.22577	1.81388	-1.52561	11.5921	4.32087
Goose_2015-10-24_064	2	6.18619	36.0624	17.62	1.15964	-2.94345	0.104179	-1.87127	21.6651	2.35537
Goose_2015-10-24_065	2	3.01279	69.1911	41.224	0.446377	-0.688854	0.740463	-0.910198	11.0298	1.84152
Goose_2015-10-24_073	2	3.70595	37.8417	21.2792	0.542325	-0.555679	0.073373	-0.672207	6.20156	1.96047
Goose_2015-10-27_004	2	3.94453	12.9367	17.4581	3.22186	-0.763064	1.47736	-1.61278	51.2114	0.991296
Goose_2015-10-27_021	2	3.13892	32.2011	21.8403	0.291609	-0.465979	1.63014	-2.23913	11.533	1.83716
Goose_2015-10-27_029	2	11.386	244.999	33.7481	3.57873	-7.60585	2.67907	-6.65526	15.1256	8.31052
Goose_2015-11-02_003	2	3.15528	219.954	155.877	1.00663	-0.239512	0.934356	-0.797766	14.0588	1.48465
Goose_2015-11-02_013	2	4.95371	495.088	427.692	0.796007	-0.132994	0.581332	-0.080431	9.45551	1.56277
Goose_2015-11-02_027	2	8.08708	119.975	47.8212	1.75075	-1.78583	3.27641	-5.90669	14.4828	3.05328
Goose_2015-11-02_034	2	4.02913	33.1533	15.0687	0.980455	-0.941039	0.732543	-1.12627	12.2377	2.56511
Goose_2015-11-02_047	2	8.23027	150.416	45.716	1.9188	-1.74521	1.91609	-1.32018	12.6257	4.20334
Goose_2015-11-02_050	2	3.76931	38.1701	14.5698	1.05438	-0.972636	1.33837	-1.08019	12.6321	2.72653
Goose_2015-11-02_083	2	8.52384	461.485	377.767	2.06946	-0.234326	1.91256	-0.804723	10.653	5.09076
Goose_2017-06-08_061	2	3.0334	39.6684	21.3	0.798081	-1.46693	0.788167	-0.708486	15.0864	2.05085
Goose_2017-06-08_069	2	3.22927	227.804	181.44	1.15868	-0.281916	0.966434	-0.698111	12.8979	1.96455
Goose_2017-06-08_072	2	3.81981	389.411	242.26	0.708519	-0.370858	1.04478	-0.818876	9.41962	2.50897
Goose_2017-06-08_081	2	8.43038	23.055	16.68	2.6372	-2.33807	0.063705	-5.80794	32.2312	1.75869
Goose_2017-06-08_082	2	8.69172	54.5313	11.22	1.19816	-1.69122	1.34687	-5.16051	15.417	5.41916
Goose_2017-06-08_086	2	3.589	298.519	173.74	1.35875	-0.552048	1.43252	-0.70588	11.0937	2.11957
Goose_2017-06-08_095	2	8.12912	70.754	10.94	0.925224	-1.02806	1.87142	-1.99621	9.01565	6.56721
Goose_2017-06-08_138	2	3.62217	32.7846	26.8	1.77833	-0.214985	1.51352	-1.1355	11.2846	1.40447
Goose_2017-06-08_145	2	3.95835	94.5837	42.16	1.02972	-0.798303	0.9641	-0.890868	9.54279	2.49499
Goose_2017-06-08_146	2	3.65324	185.247	109.88	0.849224	-0.705759	1.09208	-1.07484	15.4695	2.0403
Goose_2017-06-08_150	2	8.11854	175.876	65.18	1.53386	-0.144113	1.50505	-1.00453	14.0148	3.97469
Goose_2017-06-08_152	2	7.40412	186.36	52.62	2.7396	-1.83327	3.00132	-2.18391	11.8596	3.9673
Goose_2017-06-08_155	2	3.06205	26.9231	18.82	0.354218	-0.548681	0.115618	-1.01353	11.2068	1.55623
Goose_2017-06-08_157	2	6.7933	139.974	42.86	3.99949	-2.20524	2.04618	-4.30005	13.4793	3.74326
Goose_2017-06-08_158	2	4.09161	86.0043	40.82	0.600028	-1.23349	1.71038	-0.88309	9.48542	2.29597
Goose_2017-06-08_159	2	4.05693	38.7411	26.36	0.574012	-0.637631	0.862779	-1.5514	16.7708	1.83707
Goose_2017-06-08_160	2	6.20705	73.3504	26.1	1.32702	-0.833084	0.845247	-2.05358	9.89598	3.42742
Goose_2017-06-08_165	2	4.35689	32.9347	10.6	0.406456	-2.58833	1.08006	-1.43307	20.3921	3.20542
Goose_2017-06-08_170	2	6.92461	133.61	41.88	2.41467	-3.01598	1.62604	-3.90196	14.1551	3.59653
Goose_2017-06-08_174	2	3.3718	12.6616	10.78	2.45988	-0.395549	0.429033	-2.66786	39.8456	1.2851
Goose_2017-06-08_184	2	6.71874	127.866	35.58	2.11918	-2.32531	1.4	-1.45843	12.0877	4.18005
Goose_2017-06-08_186	2	7.80161	211.723	54.72	2.39376	-1.90373	2.64148	-1.69103	11.6005	4.43952
Goose_2017-06-08_187	2	7.62533	200.618	61.04	3.50207	-0.550082	1.44174	-1.15568	16.8363	4.82311
Goose_2017-06-08_189	2	8.17259	110.978	28.12	1.52063	-2.32404	1.90847	-1.62329	12.3749	4.83967
Goose_2017-06-08_192	2	7.72407	211.97	56.32	1.62606	-1.41484	1.98239	-1.63543	10.3909	4.22208
Goose_2017-06-08_210	2	3.87201	92.9812	52.76	1.17487	-0.150768	0.781428	-0.728915	11.33	2.19602
Goose_2017-06-08_263	2	6.18241	60.472	26.48	3.56566	-1.30214	1.93149	-2.11397	21.1553	2.75632
Goose_2017-06-08_287	2	5.68029	31.1628	15.22	2.59664	-2.31508	2.43139	-3.0307	37.4218	2.37268
Goose_2017-06-08_294	2	3.0783	70.5608	306.76	0.749956	-0.0609829	0.821325	-1.07551	23.9458	1.58406
Goose_2017-06-08_312	2	4.74937	187.787	208.76	3.29001	-1.59305	2.84472	-1.12229	19.9564	2.0038
Goose_2017-06-08_325	2	6.15462	22.5723	11.02	0.965326	-3.4548	0.685967	-3.89165	49.6456	2.65099
Goose_2017-06-08_334	2	3.20082	20.3342	10.54	1.41997	-0.463894	0.837781	-1.22187	16.1661	2.18429
Goose_2017-06-08_341	2	3.12186	22.9896	19.74	0.298188	-0.887665	1.18272	-1.71772	16.7016	1.42155
Goose_2017-06-08_342	2	3.19187	119.774	93.68	0.40809	-0.477274	0.821805	-0.678101	7.1851	1.79248
Goose_2017-06-08_353	2	7.3491	25.3386	8.36	1.05286	-1.49153	0.680677	-8.19983	23.2483	3.43408
Goose_2017-06-08_359	2	6.38109	83.0739	30.58	1.95507	-1.30022	2.54273	-2.41696	13.4737	3.11297
Goose_2017-06-08_371	2	3.3417	61.1436	34.26	1.2506	-2.37988	0.961317	-1.29749	18.5994	2.05036
Goose_2017-06-08_378	2	8.52945	40.2713	9.48	1.67228	-0.280222	2.40468	-5.94236	13.2818	5.00351
Goose_2017-06-08_388	2	3.31711	26.2774	11.1	2.12343	-2.12307	0.402523	-1.91941	25.8276	2.54525
Goose_2017-06-30_007	2	3.47129	326.553	202.34	1.18824	-0.624753	1.35651	-0.62059	11.4125	2.08445
Goose_2017-06-30_027	2	3.75298	1147.24	913.82	1.05348	-0.0737609	1.01892	-0.803925	9.99439	1.66372
Goose_2017-06-30_055	2	5.95361	272.763	147.68	1.1585	-0.402879	1.64897	-0.857792	8.65417	2.77801
Goose_2017-06-30_115	2	9.05859	77.1405	10.04	1.18938	-3.06477	1.26117	-3.95296	12.0822	7.98575
Goose_2017-06-30_117	2	3.83481	42.8042	16.46	1.50934	-0.986698	0.709955	-1.04275	12.971	2.81802
Goose_2017-06-30_133	2	4.18468	126.846	95.16	1.4767	-0.402054	0.535961	-0.571934	12.1309	2.4126
Goose_2017-06-30_150	2	5.07199	55.4167	30.8	0.804048	-0.562177	1.70338	-1.41971	15.2346	2.2173
Goose_2017-06-30_202	2	3.434	19.1944	16.58	1.73816	-0.483958	2.37421	-1.18657	25.0638	1.86791
Goose_2017-06-30_229	2	6.6265	48.0971	15.52	1.40955	-1.20026	3.56076	-1.7027	16.7507	3.56463
Goose_2017-06-30_235	2	3.51924	32.4823	20.7	0.532024	-0.878048	0.816725	-1.00837	16.894	1.83659
Goose_2017-06-30_255	2	3.21924	23.3446	20	0.644545	-0.360785	0.325252	-1.37472	19.0818	1.58575
LpM25_2017-05-01_036	3	6.11376	63.4812	12.22	2.59156	-1.96335	0.581614	-1.66774	14.3777	5.21893
LpM25_2017-05-01_115	3	5.26158	34.9901	12.08	2.66207	-0.69022	0.116313	-1.00194	12.8545	3.2007
LpM25_2017-05-01_116	3	5.83708	31.8528	16.3	2.04785	-0.407737	0.441221	-2.33436	26.7281	2.07237
LpM25_2017-05-01_118	3	3.74919	20.0392	13.4	0.859171	-0.537692	0.870204	-2.38013	13.5107	2.11752
LpM25_2017-05-01_200	3	7.31973	67.3001	13.22	3.37985	-4.61824	3.56939	-5.84444	26.243	5.48506
LpM25_2017-05-01_203	3	5.50221	21.8105	6.52	0.190449	-2.21643	0.710546	-3.52679	24.8518	3.86748
LpM25_2017-05-01_236	3	3.71671	35.3125	22.26	1.09168	-0.257393	1.4507	-1.67609	13.9842	1.69861
LpM25_2017-05-01_237	3	5.79207	146.343	53.42	2.15083	-1.99049	3.93111	-1.6118	13.8519	3.1192
LpM25_2017-05-01_239	3	3.3495	15.0053	7.2572	0.764565	-0.341859	0.333078	-1.50759	9.51829	2.20293
LpM25_2017-05-01_242	3	4.25614	116.407	48.8637	3.94828	-0.973396	1.63064	-3.61214	14.8696	2.64131
LpM25_2017-05-01_243	3	7.15295	102.587	24.78	2.14842	-1.54248	1.25704	-2.3823	10.4733	4.58953
LpM25_2017-05-01_245	3	6.34041	108.215	31.16	2.97999	-1.46598	0.701473	-1.8972	11.3227	4.04752
LpM25_2017-05-01_246	3	6.33252	303.154	140.24	1.73758	-1.06024	2.14652	-1.1452	11.804	3.79336
LpM25_2017-05-01_251	3	5.69525	401.864	291	2.607	-0.568295	0.985215	-1.37001	13.9798	3.01502
LpM25_2017-05-01_255	3	4.29788	51.3829	24.18	0.946691	-0.741167	0.753656	-1.03486	12.6038	2.41614
LpM25_2017-05-01_261	3	7.6656	42.382	35.78	2.30853	-0.136465	1.2678	-1.24062	25.8	1.14771
LpM25_2017-05-01_266	3	8.04964	32.6133	21.74	4.41995	-3.47312	6.81886	-7.41751	41.3722	2.37249
LpM25_2017-05-01_267	3	7.33617	24.5718	7.2	1.21698	-2.38931	1.59301	-5.43524	17.2341	4.12896
LpM25_2017-05-01_279	3	8.93162	34.9366	18.48	2.22597	-3.27973	2.75493	-8.18311	25.6261	3.16089
LpM25_2017-05-01_302	3	8.11325	25.1791	5.34	2.93626	-1.5771	0.957408	-7.75304	32.7052	5.24392
LpM25_2017-05-01_304	3	3.76048	25.3981	20	1.35524	-0.755971	1.61076	-2.58232	24.1741	1.57496
LpM25_2017-05-01_315	3	4.92579	51.5846	28.94	1.29867	-1.09254	2.13234	-2.4019	13.0851	2.14996
LpM25_2017-05-01_356	3	7.97204	163.914	59.66	1.46185	-1.37882	3.63086	-4.21613	21.8183	3.49058
LpM25_2017-05-01_357	3	3.75369	323.208	217.52	0.84185	-0.127877	1.38642	-0.14463	15.477	2.12118
LpM25_2017-05-01_366	3	4.75204	67.8173	28.22	1.40675	-0.599387	1.06964	-1.0877	10.4935	2.6656
LpM25_2017-05-01_367	3	6.8494	63.4105	23.12	2.53592	-0.449087	1.30575	-1.69816	10.0865	3.44745
LpM25_2017-05-01_368	3	6.60014	202.312	59.1878	1.81791	-1.41412	4.69917	-1.33648	10.7746	3.80259
LpM25_2017-05-01_460	3	10.8151	54.7993	8.98	3.72577	-1.61754	4.97733	-9.62948	20.0353	7.15825
LpM25_2017-05-01_489	3	7.12634	21.4125	10.8	7.87126	0.000519925	0.122437	-5.12958	42.5932	2.53418
LpM25_2017-05-01_499	3	3.47845	33.3179	21.84	1.60231	-1.45279	1.18845	-2.32893	17.8021	1.72116
LpM25_2017-05-01_605	3	5.33004	30.9953	9.52	2.43999	0.217123	1.57063	-4.54336	14.7057	3.93228
LpM25_2017-05-01_679	3	3.52923	20.4361	7.2	0.899392	-0.384972	1.01032	-0.956324	10.1352	3.03077
